# Supplementary material for: RAB4A GTPase regulates epithelial-to-mesenchymal transition by modulating RAC1 activation
Source: Springer Nature journal article supplement (doi:10.1186/s13058-022-01564-6), 2022-10-28
Supplement: MOESM1 [file 23651332]

## I. Supplementary Tables

**Supplementary Table 1. List of primers used in the study**

| <b>Primer</b> | <b>Forward sequence 5'-3'</b> | <b>Reverse sequence 5'-3'</b> |
|---------------|-------------------------------|-------------------------------|
| RAB4A         | AATCAGGTGAGCTGGACCCAGAAA      | ACCTGTGTGCTCTCCTAACCAACCA     |
| ZEB1          | AGTGGTCATGAAAATGGAAC          | AGGTGTAAGTGCACAGGGAGC         |
| CDH1          | GTCCTGGGCAGAGTGAATTT          | GACCAAGAAATGGATGTGTGG         |
| VIM           | CGAGGAGAGCAGGATTTCTC          | GGTATCAACCAGAGGGAGTGA         |
| OCCLN         | AAAGTCCACCTCCTTACAGGC         | GGCTGAGAGAGCATTGGTCG          |
| 18S           | AAGTTCGACCGTCTTCTCAGC         | GTTGATTAAGTCCCTGCCCTTG        |

**Supplementary Table 2. List of antibodies used in immunoblotting, immunohistochemistry and immunofluorescence analysis**

| <b>Antibody</b>   | <b>Cat no</b> | <b>Provider</b> |
|-------------------|---------------|-----------------|
| E-cadherin (CDH1) | 3195          | Cell signaling  |
| Aldh1A3           | GTX110784     | Genetex         |
| CD44              | GTX102111     | Genetex         |
| ITG $\beta$ 3     | ab190147      | Abcam           |
| RAB4A             | WH0005867M1   | Sigma           |
| $\beta$ -Tubulin  | 2128          | Cell signaling  |

## II. Supplementary Figures

### Figure S1. RAB4A knockdown reduces the anchorage independent colony formation.

(A) Immunoblot assessment of RAB4A knockdown efficiency by two targeting RNAi.

(B) Soft agar colony formation of MDA-MB-231 cells with stable RAB4A knockdown using two distinct RNAi sequences (RAB4A<sup>KD#1</sup> or RAB4A<sup>KD#2</sup>) compared to control cells. Top: Representative microscopic images of the colonies formed after 20 days of culture in noble agar; bottom: Relative quantification of colony numbers compared to the control.

### Figure S1

A

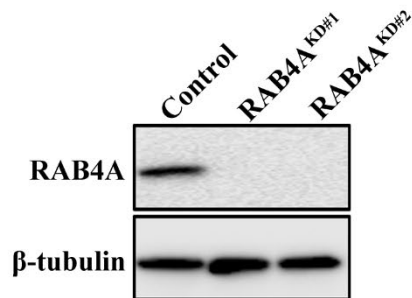

B

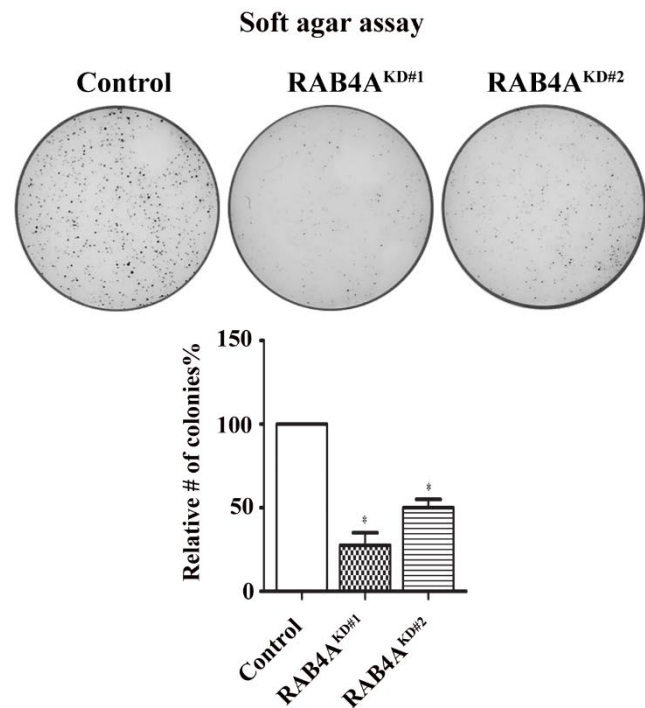

**Figure S2. RAB4A regulates EMT gene expression and cell invasion.**

Gene expression changes in response to RAB4A silencing using the EMT qPCR multiplex array (SAB target list, H384, Bio-Rad). The first two columns are the comparisons made between the control and RAB4A knockdown cells; the color code indicates increased (red) or decreased (green) expression associated with RAB4A knockdown. The third column labeled "In EMT\*" denotes the regulation of expression in a typical EMT process based on published research; red and green indicate genes whose expression is typically up- or down-regulated when cells go through EMT<sup>1-3</sup>.

Figure S2

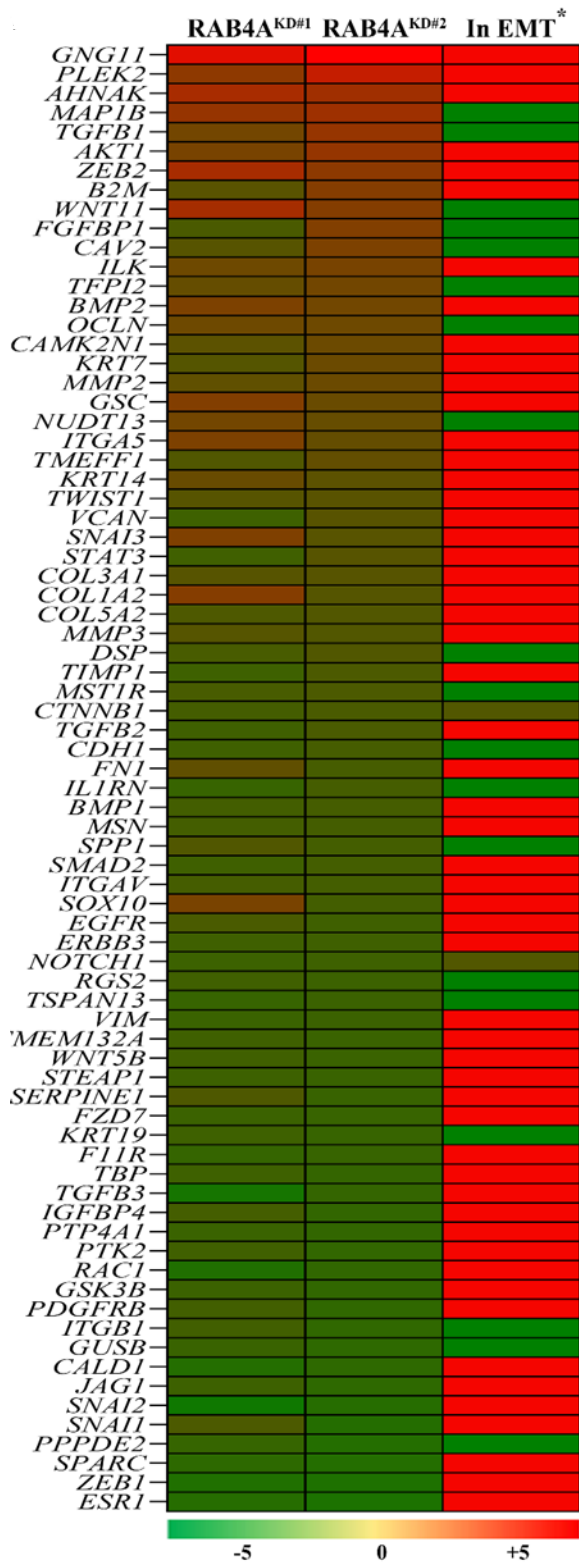

**Figure S3. Constitutively active RAC1 expression restores MDA-MB-231 cell colony formation ability that was lost upon RAB4A knockdown, while exerting no significant adherent cell proliferation.**

(A) Cell proliferation assay performed using adherent-cultured MDA-MB-231 cells expressing RAB4A shRNA alone or in combination with RAC1<sup>WT</sup> or RAC1<sup>CA</sup> overexpression. Proliferation was recorded continuously for 120 hours using IncuCyte live-cell imaging.

(B) Soft agar assay on the same group of cells as in (A). Plates were visualized after 21 days in culture.

**Figure S3**

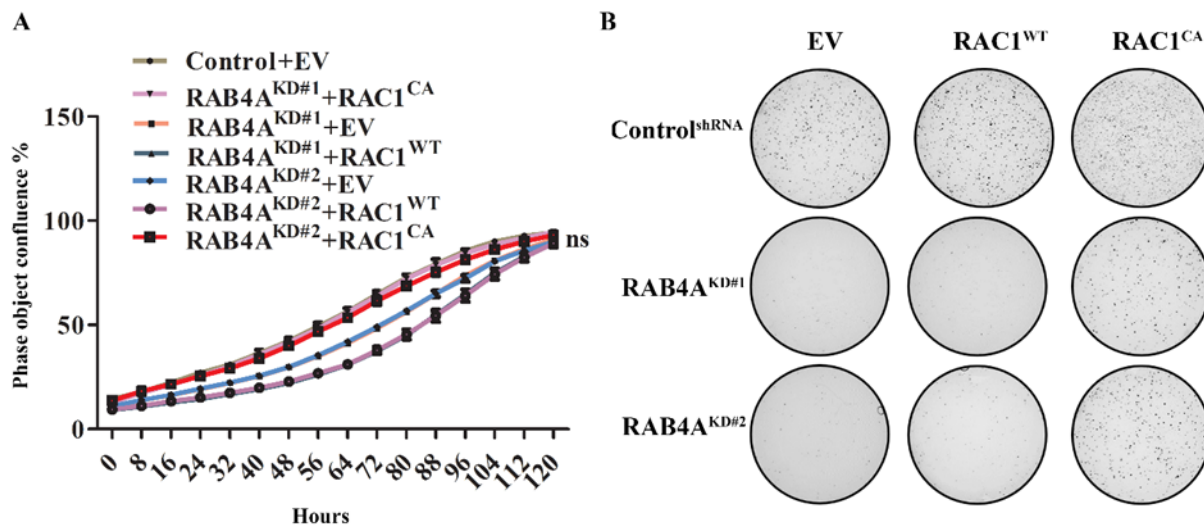

**Figure S4. RAB4A activation of RAC1 involves integrin  $\beta$ 3 function.**

(A) Invasion ability of MCF7 breast cancer cells with and without overexpression of integrin  $\beta$ 3.

Scale bar - 100  $\mu$ m.

(B) Pulldown quantification of GTP-bound RAC1 from MCF7 breast cancer cells with and without overexpression of integrin  $\beta$ 3. Lane 1, 4 – lysate plus GTP $\gamma$ S; Lane 2, 5 – lysate plus GDP; Lane 3, 6 – lysate only; Lane 7 – recombinant RAC1 as immunoblot control. Lane 8, 9 are the total lysate input for MCF7 control cells (EV) and MCF7 expressing integrin  $\beta$ 3.

(C) Q-PCR analysis of ZEB1 and CDH1 transcription levels in the cell groups of (A); the baseline was set by mock expression cells (EV). “\*”:  $p < 0.05$  compared to the baseline.

(D) Invasion ability of MDA-MB-231 breast cancer cells with and without integrin  $\beta$ 3 knockdown; two different shRNAs were used to establish stable integrin  $\beta$ 3 knockdown cells. Scale bar - 100  $\mu$ m.

(E) Quantification of GTP-bound RAC1 from the cell groups in (D). Lane 1, 4, 7 – lysate plus GTP $\gamma$ S; Lane 2, 5, 8 – lysate plus GDP; Lane 3, 6, 9 – lysate only; Lane 10 – Recombinant RAC1 as SDS PAGE immunoblot control. Total lysate inputs: lane 11 – control shRNA, lane 12 – ITG $\beta$ 3 shRNA1, lane 13 – ITG $\beta$ 3 shRNA2.

(F) Q-PCR analysis of ZEB1 and CDH1 transcription levels in the cell groups in (D); the baseline was set by cells that express control shRNA. “\*”:  $p < 0.05$  compared to the baseline.

Figure S4

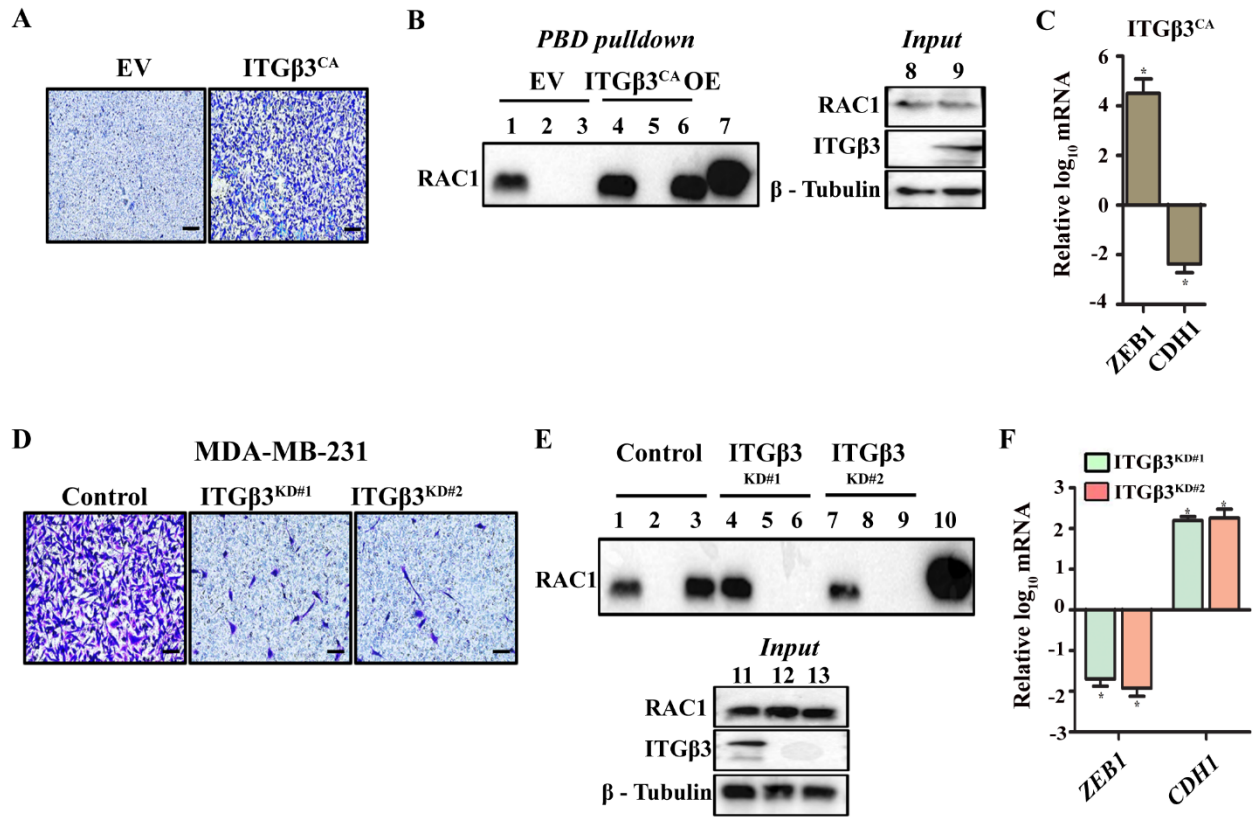

**Figure S5. Suppressing RAB4A expression in RAB4A-high cells reduces soft agar colony formation but has little impact on proliferation under the adherent culturing condition.**

(A, B) Cell proliferation assay, under adherent culturing condition, on RAB4A-high PC3 (A) and SNB19 (B) cells; the comparison was made between cells with and without RAB4A knockdown.

Proliferation was recorded continuously for 120 hours using IncuCyte live-cell imaging method.

(C, D) Soft agar assay on RAB4A-high PC3 (C) and SNB19 (D) cells with and without RAB4A knockdown. Top: Representative microscopic images of the colonies formed after 20 days of culture in noble agar; bottom: Quantification of relative colony numbers compared to the control using OpenCFU and Prism software. “\*”,  $p < 0.05$ .



Figure S5

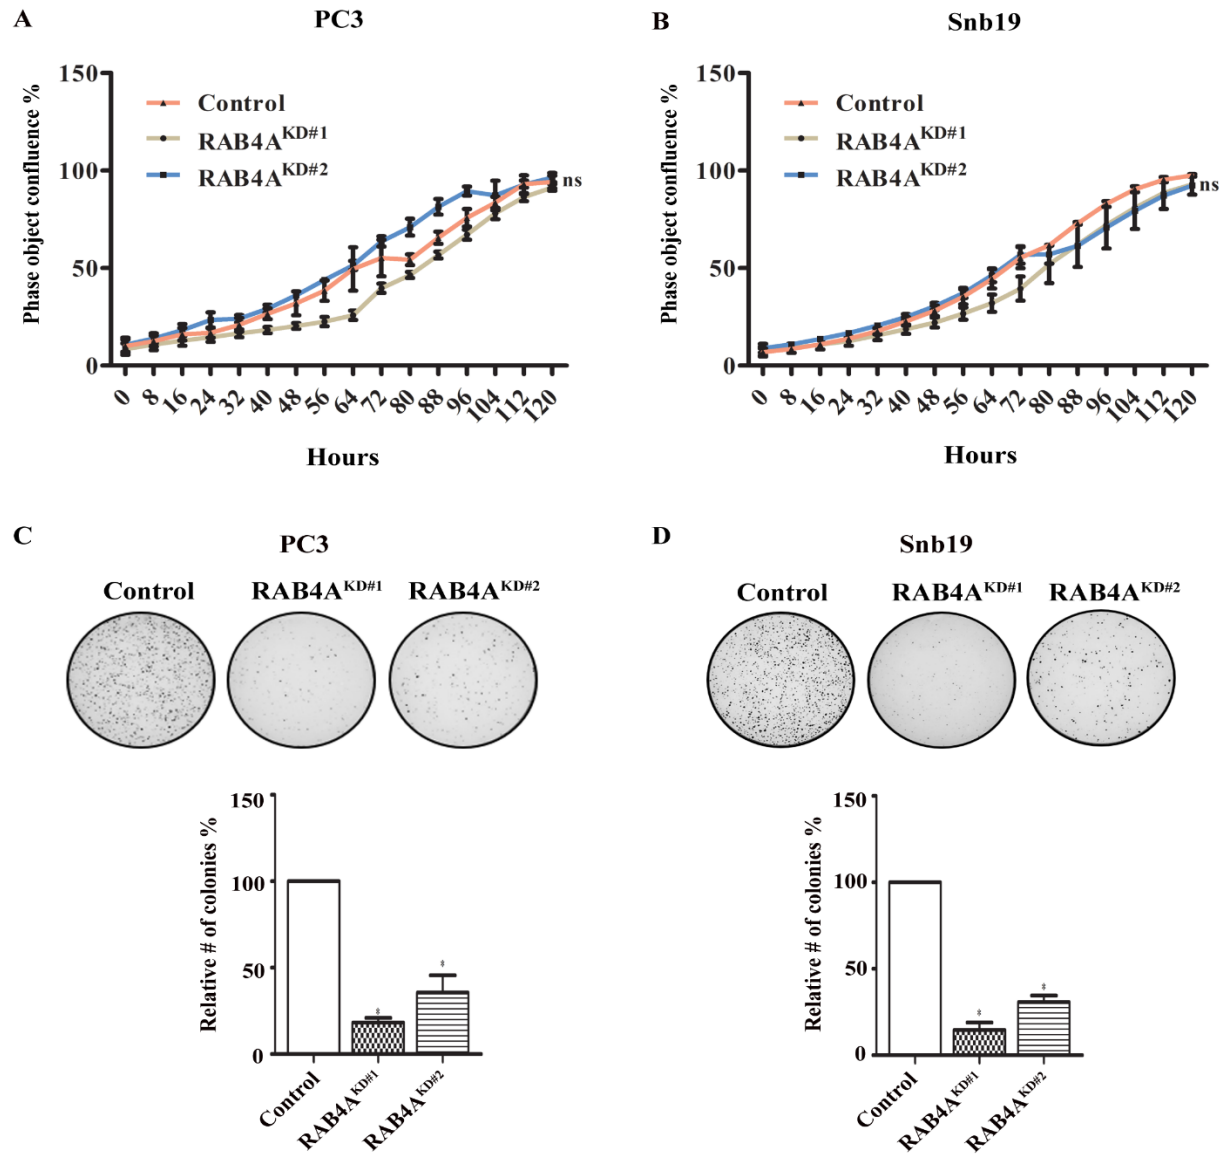

**Figure S6. Wild-type RAB4A expression in RAB4A-low cells increases the soft agar colony formation ability while has little impact on adherent cell proliferation.**

(A, B) The impact of RAB4A on cell proliferation, under the adherent culturing condition, on RAB4A-low MCF7 (A) and H1299 (B) cells; the comparison was made between vector control and wild-type and mutant RAB4A expressing cells. The proliferation was recorded continuously for 120 hours using IncuCyte live-cell imaging method.

(C, D) Soft agar assay on RAB4A-low MCF7 (C) and H1299 (D) cells with wild-type or mutant RAB4A protein expression as compared with vector control cells. Top: Representative microscopic images of the colonies formed after 20 days of culture in noble agar; bottom: Relative quantification of colony numbers compared to the control was analyzed using OpenCFU and Prism software. “\*”,  $p < 0.05$ .

Figure S6

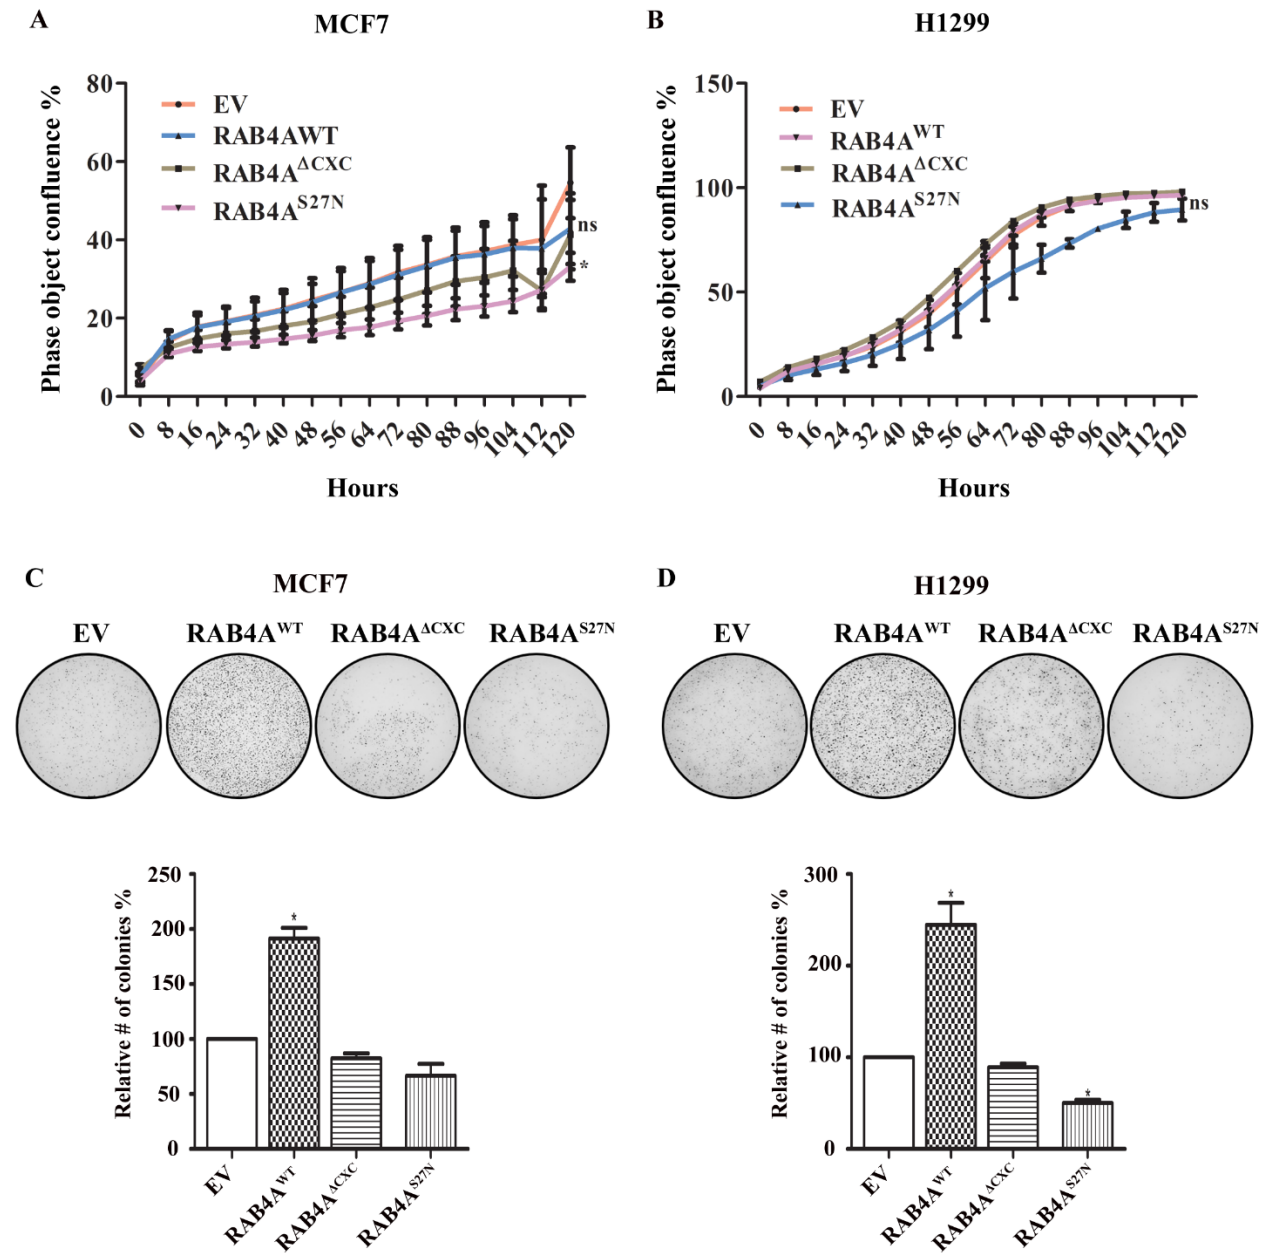

**Figure S7. Constitutively active, but not wild-type, RAC1 restores the MDA-MB-231 cell tumor forming ability that is lost from RAB4A knockdown in the orthotopic mammary fat pad mice model.**

Representative mammary pad tumor images from each of the nine experimental groups, which are those with or without the RAB4A knockdown combined with or without the expression of RAC1. The red arrows point to the tumors after dissection. Specifically, the groups are: (1) control shRNA and empty expression vector (Control<sup>KD</sup> + EV), (2) control shRNA and wild-type RAC1 expression (Control<sup>KD</sup> + RAC1<sup>WT</sup>), (3) control shRNA and active RAC1 expression (Control<sup>KD</sup> + RAC1<sup>CA</sup>), (4) RAB4A shRNA #1 and empty expression vector (RAB4A<sup>KD#1</sup> + EV), (5) RAB4A shRNA #1 and wild-type RAC1 expression (RAB4A<sup>KD#1</sup> + RAC1<sup>WT</sup>), (6) RAB4A shRNA #1 and active RAC1 expression (RAB4A<sup>KD#1</sup> + RAC1<sup>CA</sup>), (7) RAB4A shRNA #2 and empty expression vector (RAB4A<sup>KD#2</sup> + EV), (8) RAB4A shRNA #2 and wild-type RAC1 expression (RAB4A<sup>KD#2</sup> + RAC1<sup>WT</sup>), and (9) RAB4A shRNA #2 and active RAC1 expression (RAB4A<sup>KD#2</sup> + RAC1<sup>CA</sup>).

Figure S7

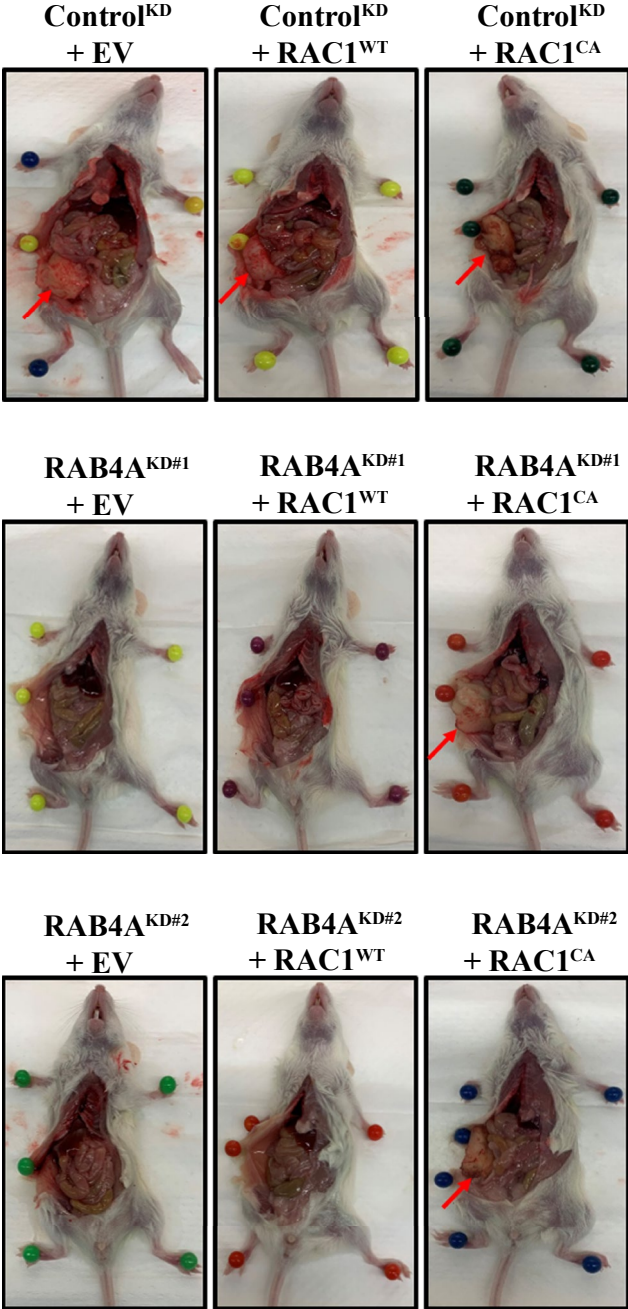

## References

1. Jung AR, Jung CH, Noh JK, Lee YC, Eun YG. Epithelial-mesenchymal transition gene signature is associated with prognosis and tumor microenvironment in head and neck squamous cell carcinoma. *Sci Rep.* 2020;10(1):3652.
2. Thompson JC, Hwang WT, Davis C, et al. Gene signatures of tumor inflammation and epithelial-to-mesenchymal transition (EMT) predict responses to immune checkpoint blockade in lung cancer with high accuracy. *Lung Cancer.* 2020;139:1-8.
3. Stemmler MP, Eccles RL, Brabletz S, Brabletz T. Non-redundant functions of EMT transcription factors. *Nat Cell Biol.* 2019;21(1):102-112.
